# Supplementary material for: Covalent-organic framework as a template to assemble carbon nanotubes into a high-density membrane: computational demonstration
Source: Royal Society of Chemistry journal article supplement (doi:10.1039/c3nr03964a), 2013-10-14
Supplement: c3nr03964a.pdf [file c3nr03964a.pdf]

## Electronic Supplementary Information

### Covalent-organic framework as a template to assemble carbon nanotubes into a high-density membrane: computational demonstration

Zhongqiao Hu and Jianwen Jiang\*

*Department of Chemical and Biomolecular Engineering, National University of Singapore, 117576, Singapore*

**Table S1.** Lennard-Jones parameters and atomic charges. The LJ parameters for COF-8 and CHCl<sub>3</sub> atoms are adopted from the Amber force field (ref. 1), except for B atom that is from ref. 2. The parameters for C atom in CNT are from ref. 3.

| Species           | Atoms | $\sigma$ (nm) | $\epsilon$ (kJ/mol) | $q$ (e) |
|-------------------|-------|---------------|---------------------|---------|
| COF-8             | B     | 0.3960        | 0.1423              | +0.5029 |
|                   | O     | 0.2960        | 0.8786              | -0.4193 |
|                   | C1    | 0.3400        | 0.3598              | -0.0676 |
|                   | C2    | 0.3400        | 0.3598              | +0.3381 |
|                   | C3    | 0.3400        | 0.3598              | +0.1563 |
|                   | C4    | 0.3400        | 0.3598              | -0.2403 |
|                   | H     | 0.2650        | 0.0657              | +0.1120 |
| CHCl <sub>3</sub> | C     | 0.2789        | 0.2466              | -0.3847 |
|                   | Cl    | 0.3564        | 1.3598              | +0.0396 |
|                   | H     | 0.3011        | 0.6897              | +0.2659 |
| CNT               | C     | 0.3400        | 0.3598              | 0       |

**Table S2.** Parameters of bond stretching and bending potentials for CHCl<sub>3</sub>.

| Stretching |                                           |                     |
|------------|-------------------------------------------|---------------------|
| $i-j$      | $k_r$ [ $10^5$ kJ/(mol·nm <sup>2</sup> )] | $r_0$ (nm)          |
| C-Cl       | 1.9447                                    | 0.1758              |
| C-H        | 2.8451                                    | 0.1100              |
| Bending    |                                           |                     |
| $i-j-k$    | $k_\theta$ ( $10^2$ kJ/mol)               | $\theta_0$ (degree) |
| Cl-C-H     | 3.1882                                    | 107.68              |
| Cl-C-Cl    | 6.5019                                    | 111.30              |

- (1) Cornell, W. D.; Cieplak, P.; Bayly, C. I.; Gould, I. R.; Merz, K. M.; Ferguson, D. M.; Spellmeyer, D. C.; Fox, T.; Caldwell, J. W.; Kollman, P. A. A 2<sup>nd</sup> Generation Force-Field for the Simulation of Proteins, Nucleic-Acids, and Organic-Molecules. *J. Am. Chem. Soc.* **1995**, *117*, 5179-5197.
- (2) Tafi, A.; Agamennone, M.; Tortorella, P.; Alcaro, S.; Gallina, C.; Botta, M. Amber Force Field Implementation of the Boronate Function to Simulate the Inhibition of Beta-Lactamases by Alkyl and Aryl Boronic Acids. *Eur. J. Med. Chem.* **2005**, *40*, 1134-1142.
- (3) Hummer, G.; Rasaiah, J. C.; Noworyta, J. P. Water Conduction through the Hydrophobic Channel of a Carbon Nanotube. *Nature* **2001**, *414*, 188-190.
